# Supplementary material for: Soil denitrifier community size changes with land use change to perennial bioenergy cropping systems
Source: Copernicus journal article supplement (doi:10.5194/soil-2-523-2016), 2016-10-19
Supplement: Supplementary file 1 [file soil-2-523-2016-supplement.zip]

Supplementary Table 1. Pearson's correlation matrix (n=120).

|                    | <i>nirS</i> | <i>nosZ</i> | 16S rRNA    | H <sub>2</sub> O | NO <sub>3</sub> -N | NH <sub>4</sub> -N |
|--------------------|-------------|-------------|-------------|------------------|--------------------|--------------------|
| <i>nirS</i>        | 1           |             |             |                  |                    |                    |
| <i>nosZ</i>        | 0.56331 **  | 1           |             |                  |                    |                    |
| 16S rRNA           | 0.23262 *   | 0.04634 NS  | 1           |                  |                    |                    |
| H <sub>2</sub> O   | 0.28435 *   | 0.25253 *   | 0.79571 **  | 1                |                    |                    |
| NO <sub>3</sub> -N | -0.41428 ** | -0.34451 ** | -0.16351 NS | -0.06318 NS      | 1                  |                    |
| NH <sub>4</sub> -N | 0.44512 **  | 0.37178 **  | 0.29141 *   | 0.25758 *        | -0.36619 **        | 1                  |

\*p<0.05

\*\*p<0.001

NS= not significant
