# Supplementary material for: Soil denitrifier community size changes with land use change to perennial bioenergy cropping systems
Source: Copernicus journal article supplement (doi:10.5194/soil-2-523-2016), 2016-10-19
Supplement: Supplementary file 2 [file soil-2-523-2016-supplement.zip]

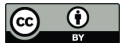

## *Supplement of*

# **Soil denitrifier community size changes with land use change to perennial bioenergy cropping systems**

**Karen A. Thompson et al.**

*Correspondence to:* Kari E. Dunfield ([dunfield@uoguelph.ca](mailto:dunfield@uoguelph.ca))

- [soil-2-523-2016-supplement-title-page.pdf](#)
- [Thompson et al 2016 2010 Climate Data.txt](#)
- [Thompson et al 2016 2011 Climate Data.txt](#)
- [Thompson et al 2016 2012 Climate Data.txt](#)
- [Thompson et al 2016 Corn Yield Data.txt](#)
- [Thompson et al 2016 GC N H2O Data.txt](#)
- [Thompson et al 2016 PG Yield Data.txt](#)
- [supplement.pdf](#)

The copyright of individual parts of the supplement might differ from the CC-BY 3.0 licence.
